# Supplementary material for: Peripheral Cone Dystrophy: Expanded Clinical Spectrum, Multimodal and Ultrawide-Field Imaging, and Genomic Analysis
Source: Hindawi journal article supplement (doi:10.1155/2018/2984934), 2018-07-11

**Supplementary Table 1.** Candidate photoreceptor and macular dystrophy genes.

| <b>Pattern Dystrophy</b> | <b>Cone-Rod Dystrophy</b> | <b>Rod-Cone Dystrophy</b>         |
|--------------------------|---------------------------|-----------------------------------|
| <i>ABCA4</i>             | <i>ADAM9</i>              | <i>CA4</i>                        |
| <i>ATXN7</i>             | <i>AIPL1</i>              | <i>CERKL</i>                      |
| <i>BEST1</i>             | <i>ALMS1</i>              | <i>CRB1</i>                       |
| <i>ELOVL4</i>            | <i>BBS10</i>              | <i>RHO</i>                        |
| <i>IMPG1</i>             | <i>C8orf37</i>            |                                   |
| <i>IMPG2</i>             | <i>CACNA1F</i>            |                                   |
| <i>RP1L1</i>             | <i>CDHR1</i>              |                                   |
| <i>RPGR</i>              | <i>CNNM4</i>              |                                   |
|                          |                           | <b>Cone Development, Function</b> |
|                          | <i>CRX</i>                | <i>BLIMP1</i>                     |
|                          | <i>DFNB59</i>             | <i>NEUROD2</i>                    |
|                          | <i>GUCY2D</i>             | <i>NR2E3</i>                      |
| <b>Cone Dystrophy</b>    |                           | <i>NRL</i>                        |
| <i>CACNA2D4</i>          |                           |                                   |
| <i>CNGA3</i>             | <i>PITPNM3</i>            | <i>OPN1LW</i>                     |
| <i>CNGB3</i>             | <i>POC1B</i>              | <i>OPN1MW</i>                     |
| <i>GUCA1A</i>            | <i>RAB28</i>              | <i>OPN1SW</i>                     |
| <i>KCNV2</i>             | <i>RAXL1</i>              | <i>OTX2</i>                       |
| <i>PDE6C</i>             | <i>RIMS1</i>              | <i>RAX</i>                        |
| <i>PDE6H</i>             | <i>RPGRIP1</i>            | <i>RORB2</i>                      |
| <i>PROM1</i>             | <i>SEMA4A</i>             | <i>RXRG</i>                       |
| <i>PRPH2</i>             | <i>TTL5</i>               | <i>THRB2</i>                      |

**Supplementary Table 2.** Variants detected in candidate photoreceptor or macular dystrophy genes.

| Position       | Reference | Variant | Gene   | OMIM Disease                                        | Transcript  | IDDNA variant | Protein varian | Case 1 | Case 2 | Case 3 | Grantham | PHRED/C-score | SIFT      | SIFT Score | PolyPhen-2 Prediction | PhyloP p-value | dbSNP ID    | 1000 G | MAF | EVS    | MAF | ExAC     | MAF |
|----------------|-----------|---------|--------|-----------------------------------------------------|-------------|---------------|----------------|--------|--------|--------|----------|---------------|-----------|------------|-----------------------|----------------|-------------|--------|-----|--------|-----|----------|-----|
| Chr1:94517254  | C         | G       | ABCA4  | Stargardt disease, Cone-rod dystrophy 3 (recessive) | NM_000350.2 | c.2588G>C     | p.G863A        | Het    |        |        | 60       | 26.4          | Damaging  | 0.002      | Probably Damaging     | 1.25E-04       | rs76157638  | 0.0012 |     | 0.0052 |     | 0.0051   |     |
| Chr3:100962651 | G         | T       | IMPG2  | Vitelliform macular dystrophy 5 (dominant)          | NM_016247.3 | c.2524C>A     | p.L842M        | Het    |        |        | 15       | 23.1          | Damaging  | 0          | Probably Damaging     |                | rs149896250 | 0.0006 |     | 0.0002 |     | 0.0004   |     |
| Chr3:101039185 | G         | T       | IMPG2  | Vitelliform macular dystrophy 5 (dominant)          | NM_016247.3 | c.32C>A       | p.S11Y         |        | Het    |        | 144      | 22.6          | Damaging  | 0          | Possibly Damaging     |                | rs137927107 | 0.0004 |     | 0.0003 |     | 0.0001   |     |
| Chr8:10464692  | A         | T       | RP1L1  | Occult macular dystrophy (dominant)                 | NM_178857.5 | c.6916T>A     | p.W2306R       |        | Het    |        | 101      | 8.732         | Damaging  | 0.02       | Benign                |                | rs200403049 | 0.0026 |     | 0.003  |     | 0.0009   |     |
| Chr8:10469738  | C         | T       | RP1L1  | Occult macular dystrophy (dominant)                 | NM_178857.5 | c.1870G>A     | p.A624T        |        | Het    |        | 58       | 2.405         | Tolerated | 0.137      | Benign                |                | rs141846905 | 0.0024 |     | 0.003  |     | 0.0009   |     |
| Chr8:38961159  | G         | T       | ADAM9  | Cone-rod dystrophy 9 (recessive)                    | NM_003816.2 | c.2400G>T     | p.Q800H        |        |        | Het    | 24       | 21.6          | Damaging  | 0.004      | Probably Damaging     | 4.49E-04       | rs145276865 | 0      |     | 0.0002 |     | 0.00006  |     |
| Chr17:7917269  | G         | A       | GUCY2D | Cone-rod dystrophy 6 (dominant)                     | NM_000180.3 | c.2335G>A     | p.E779K        |        | Het    |        | 56       | 29            | Damaging  | 0.006      | Probably Damaging     | 3.94E-06       |             | 0.0004 |     | 0      |     | 0.000008 |     |

**Supplementary Table 3.** Variants detected in 2 of 3 probands in genes with known retinal expression.

| Supplementary Table 3: Variants detected in 2 of 3 probands in genes with known retinal expression. |           |        |        |                                                                                      |                |                    |                 |        |        |        |          |               |           |            |                   |                |           |            |         |           |
|-----------------------------------------------------------------------------------------------------|-----------|--------|--------|--------------------------------------------------------------------------------------|----------------|--------------------|-----------------|--------|--------|--------|----------|---------------|-----------|------------|-------------------|----------------|-----------|------------|---------|-----------|
| Position                                                                                            | Reference | Sample | Gene   | OMIM Function, Disease; Domain                                                       | Transcript ID  | Transcript Variant | Protein Variant | Case 1 | Case 2 | Case 3 | Grantham | PHRED/C-score | SIFT      | SIFT Score | PolyPhen-2        | PhyloP p-value | dbSNP ID  | 1000 G MAF | EVS MAF | ExAC MAF  |
| Chr5:89981639                                                                                       | C         | T      | GPR98  | Usher syndrome 2C (recessive); Calx-beta domain                                      | NM_032119.3    | c.6317C>T          | p.A2106V        | Het    |        |        | 64       | 27.5          | Damaging  | 0.02       | Probably Damaging | 5.78E-07       | 186999408 | 0.18       | 0.0036  | 0.0016    |
| Chr5:90016759                                                                                       | T         | C      | GPR98  | Usher syndrome 2C (recessive); No domain                                             | NM_032119.3    | c.9631T>C          | p.S3211P        |        | Het    |        | 74       | 22.6          | Tolerated | 0.09       | Probably Damaging |                |           | 0          | 0       | 0.000033  |
| Chr5:90106814                                                                                       | G         | A      | GPR98  | Usher syndrome 2C (recessive); Calx-beta domain                                      | NM_032119.3    | c.15737G>A         | p.R5246Q        | Het    |        |        | 43       | 24.3          | Tolerated | 0.44       | Possibly Damaging |                |           | 0          | 0       | 0.0000082 |
| Chr6:152720959                                                                                      | C         | T      | SYNE1  | Emery-Dreifuss muscular dystrophy 4 (dominant); Spinocerebellar ataxia 8 (recessive) | NM_033071.3    | c.7030-1G>A        | Splice          | Het    |        |        | NA       | 18.06         | NA        | NA         | NA                | 1.14E-06       |           | 0          | 0       | 0         |
| Chr6:152847259                                                                                      | C         | T      | SYNE1  | Emery-Dreifuss muscular dystrophy 4 (dominant); Spinocerebellar ataxia 8 (recessive) | NM_033071.3    | c.181G>A           | p.V61I          |        | Het    |        | 29       | 17.8          | Tolerated | 0.14       | Benign            |                | 151156420 | 0.0006     | 0.0005  | 0.00014   |
| Chr10:73464764                                                                                      | A         | G      | CDH23  | Usher syndrome 1D (recessive); Cadherin-like domain                                  | NM_022124.5    | c.2830A>G          | p.S944G         |        |        | Het    | 56       | 24.3          | Damaging  | 0.01       | Probably Damaging | 3.82E-04       | 188098974 | 0.0006     | 0.0006  | 0.0013    |
| Chr10:73567371                                                                                      | G         | A      | CDH23  | Usher syndrome 1D (recessive); Cadherin-like domain                                  | NM_022124.5    | c.8407G>A          | p.V2803I        |        | Het    |        | 29       | 23.9          | Tolerated | 0.41       | Possibly Damaging | 6.56E-05       | 369697366 | 0.0004     | 0.0001  | 0.00013   |
| Chr10:73574991                                                                                      | C         | T      | CDH23  | Usher syndrome 1D (recessive); No domain                                             | NM_022124.5    | c.10021C>T         | p.R3341C        |        |        | Het    | 180      | 14.85         | Damaging  | NA         | Possibly Damaging |                | 370074117 |            | 0.0001  | 0.00026   |
| Chr20:368854                                                                                        | G         | A      | TRIB3  | Homolog of Drosophila Tribbles , modulator of AKT                                    | NM_021158.4    | c.200G>A           | p.R67H          |        | Het    |        | 29       | 18.23         | Tolerated | 0.07       | Benign            |                | 61746925  | 0.0032     | 0.0051  | 0.0012    |
| Chr20:372180                                                                                        | C         | T      | TRIB3  | Homolog of Drosophila Tribbles , modulator of AKT                                    | NM_021158.4    | c.541C>T           | p.R181C         |        |        | Het    | 180      | 33            | Damaging  | 0.01       | Probably Damaging |                | 149447454 | 0.0004     | 0.0009  | 0.0006    |
| Chr22:38109357                                                                                      | C         | G      | TRIOBP | Deafness 28 (recessive)                                                              | NM_001039141.2 | c.395C>G           | p.S132C         |        |        | Het    | 112      | 6.772         | Damaging  | NA         | Possibly Damaging |                |           | 0          | 0       | 0.000041  |
| Chr22:38130889                                                                                      | C         | G      | TRIOBP | Deafness 28 (recessive)                                                              | NM_001039141.2 | c.4546C>G          | p.P1516A        | Het    |        |        | 27       | 5.953         | Tolerated | NA         | Benign            |                |           | 0          | 0       | 0         |
| Chr22:38134708                                                                                      | C         | G      | TRIOBP | Deafness 28 (recessive)                                                              | NM_001039141.2 | c.5166C>G          | p.D1722E        |        | Het    |        | 0        | 14.01         | Tolerated | 0.19       | Benign            |                | 183189469 | 0.0004     | 0.0003  | 0.00015   |
| Chr22:38153637                                                                                      | A         | C      | TRIOBP | Deafness 28 (recessive)                                                              | NM_001039141.2 | c.5705A>C          | p.K1902T        |        |        | Het    | 78       | 12.78         | Damaging  | 0.02       | Probably Damaging | 2.61E-03       | 138804394 | 0.0002     | 0.0005  | 0.0013    |

## Normal

## Case 1

## Case 2

## Case 3

Rod

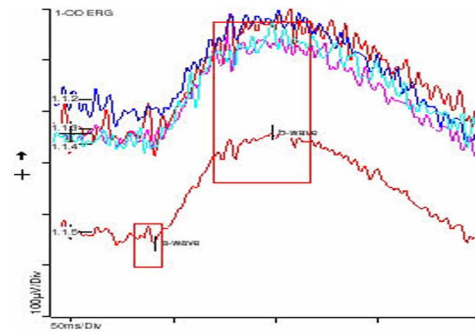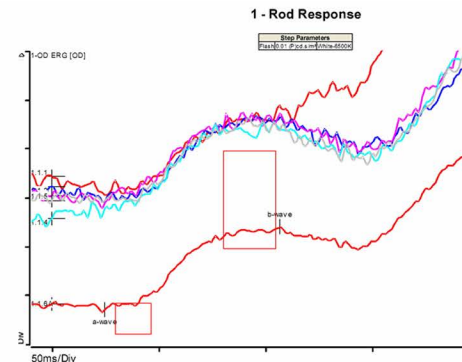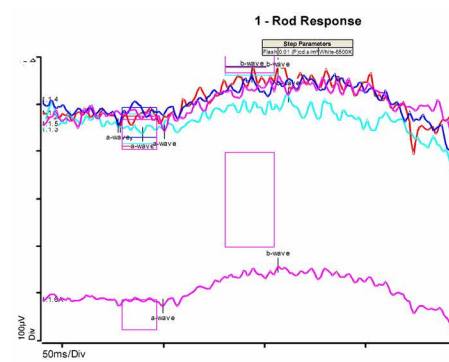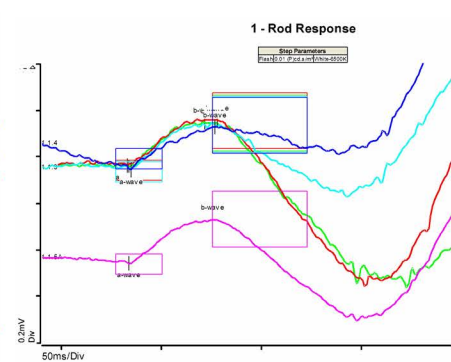

Bright White

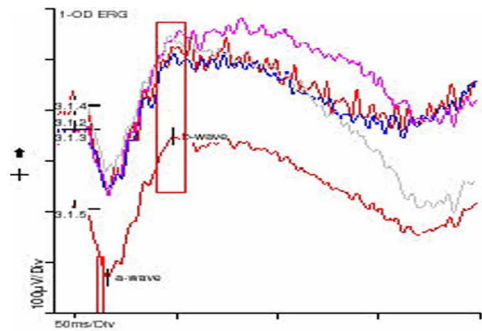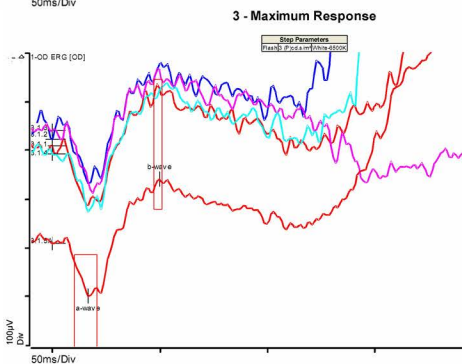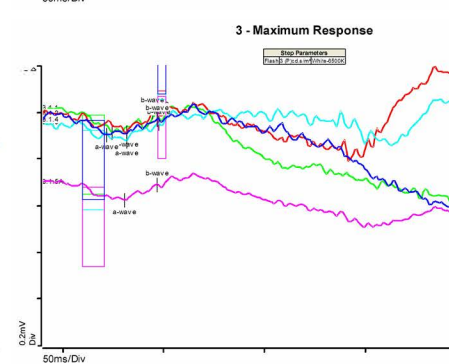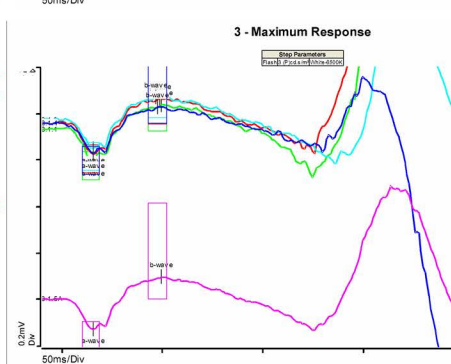

Cone

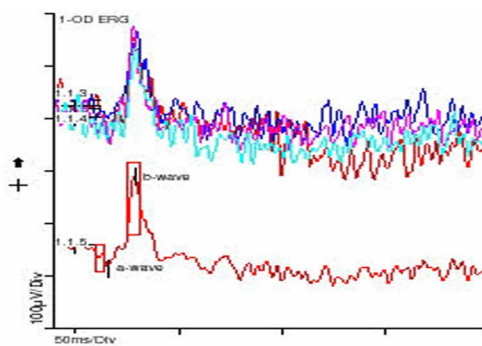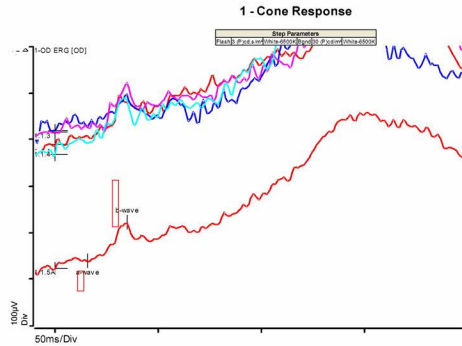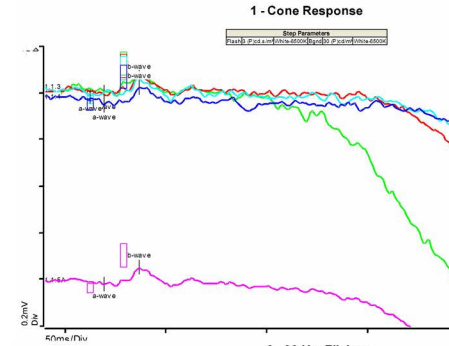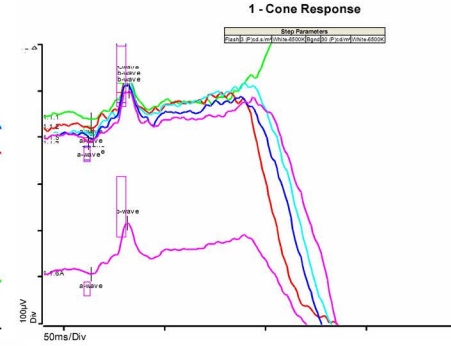

30 Hz Flicker

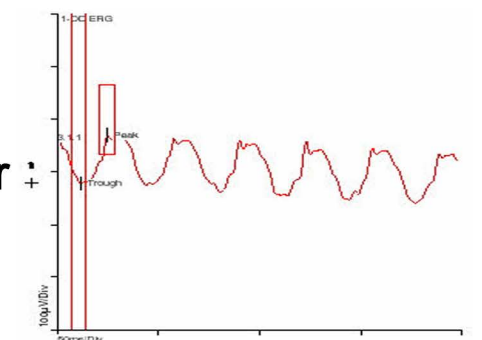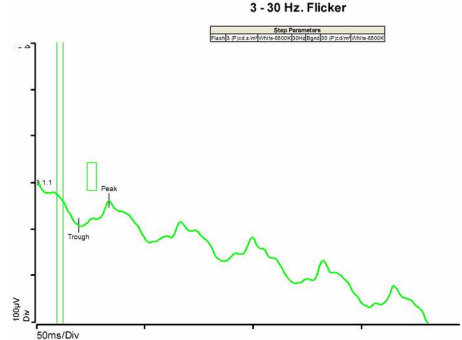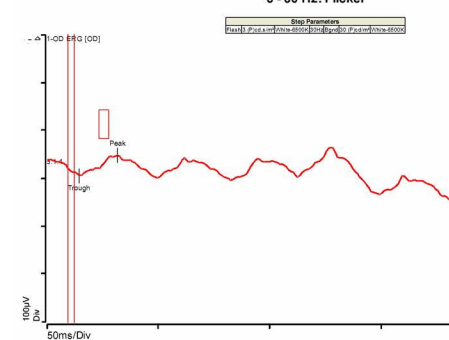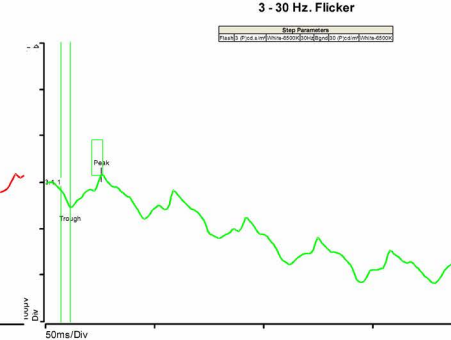

# OD

# OS

## 1

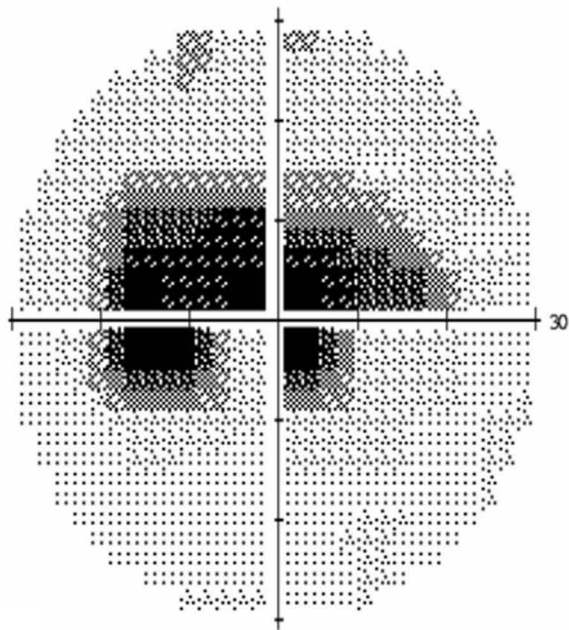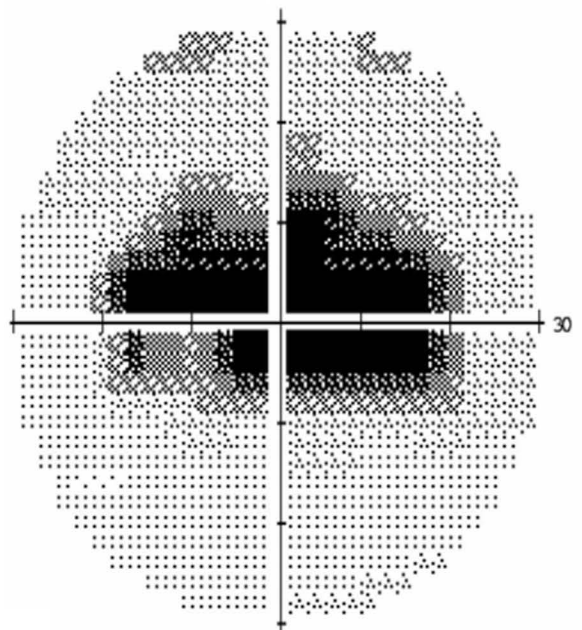

## 2

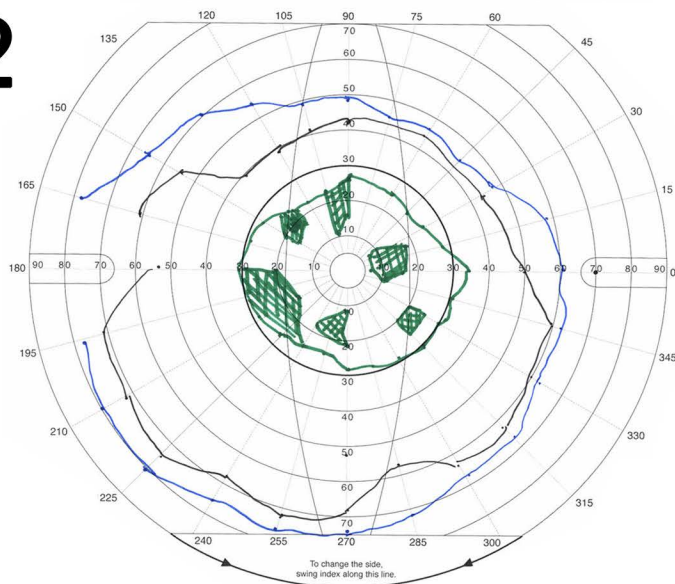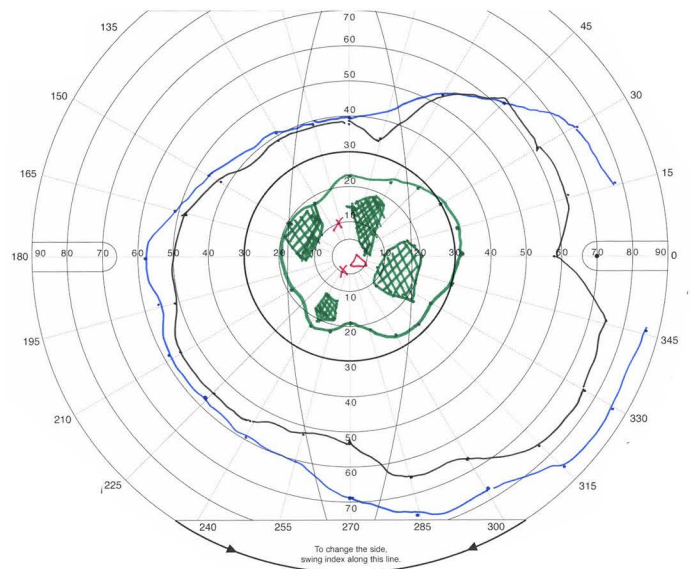

## 3

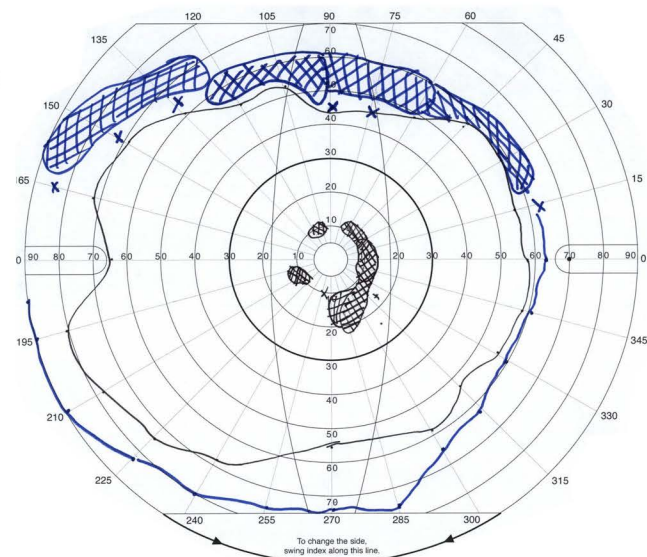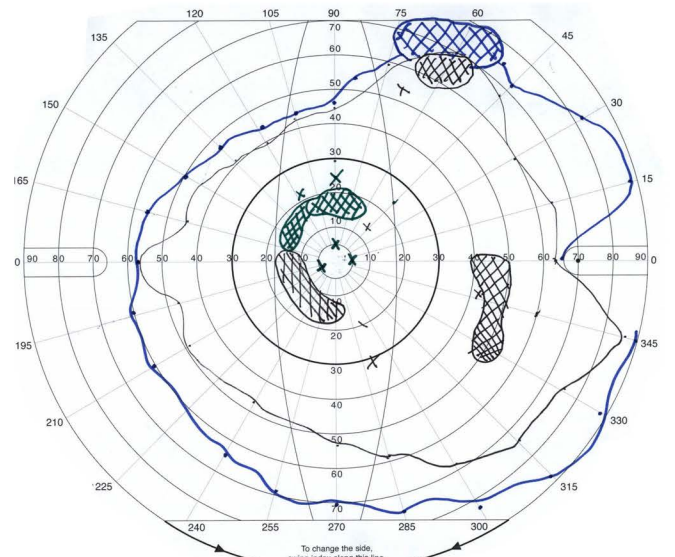



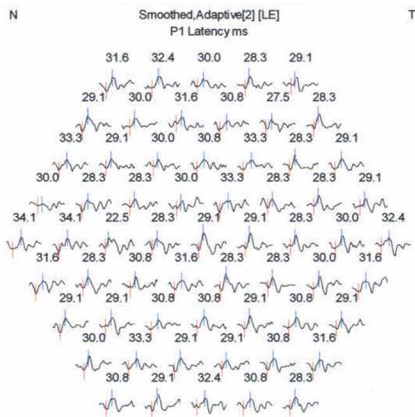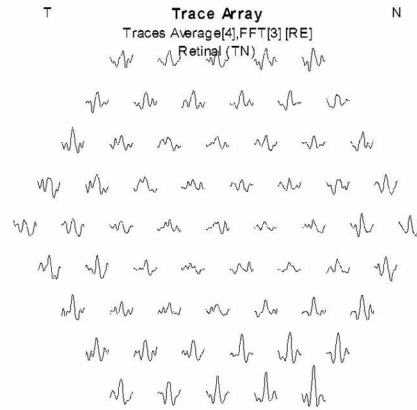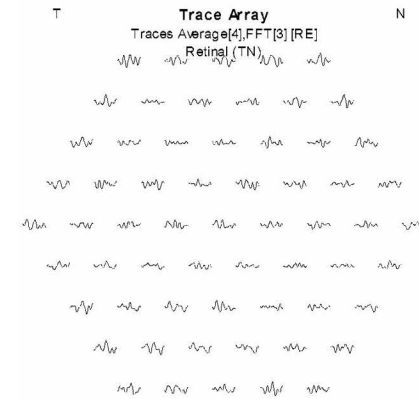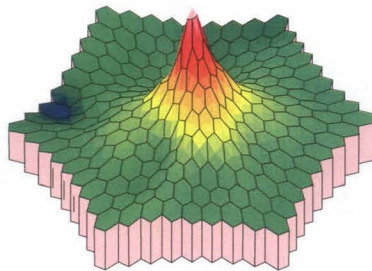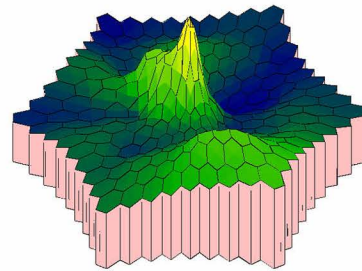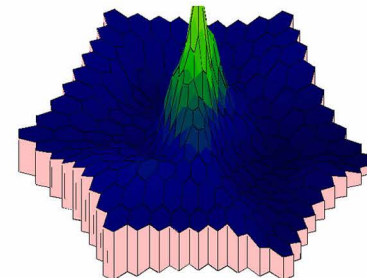

Supplement: f1 [file 2984934.f1.pdf]
